# Supplementary material for: Micelle-like luminescent nanoparticles as a visible gene delivery system with reduced toxicity
Source: Royal Society of Chemistry journal article supplement (doi:10.1039/c5tb01225b), 2015-01-01
Supplement: c5tb01225b1.pdf [file c5tb01225b1.pdf]

## Supporting Information

# Micelle-like Luminescent Nanoparticles as a Visible Gene Delivery System with Reduced Toxicity

Keni Yang, †<sup>ab</sup> Shengliang Li, †<sup>a</sup> Shubin Jin, <sup>a</sup> Xiangdong Xue, <sup>a</sup> Tingbin Zhang, <sup>a</sup> Chunqiu Zhang, <sup>\*a</sup> Jing Xu <sup>\*a</sup> and Xing-Jie Liang <sup>\*a</sup>

<sup>a</sup> CAS Key Laboratory for Biological Effects of Nanomaterials & Nanosafety, National Center for Nanoscience and Technology, No. 11 Beiyitiao, Zhongguancun, Beijing 100190, China. Fax: +86-010-62656765; Tel: +86-010-82545530; E-mail: zhangcq@nanoctr.cn, xujing@nanoctr.cn and liangxj@nanoctr.cn.

<sup>b</sup> State Key Laboratory of Natural Medicines, Department of Pharmaceutics, China Pharmaceutical University, Nanjing 210009, China

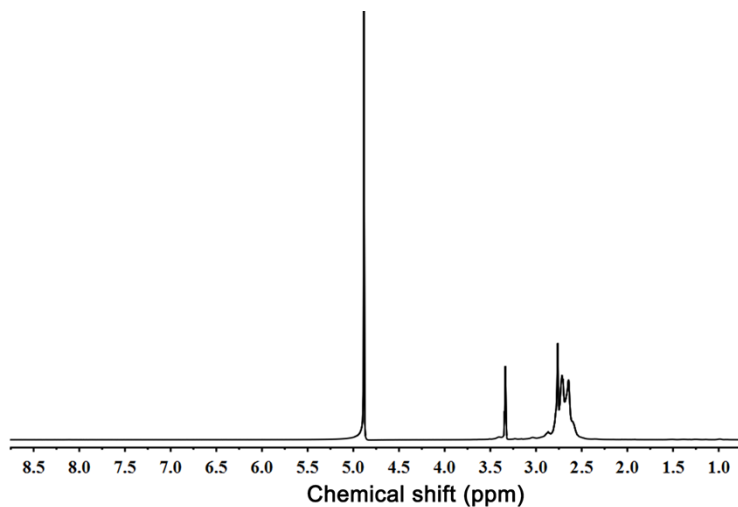

**Figure S1.**  $^1\text{H}$  NMR characterization of 25 kDa branched PEI in methanol- $d_4$ .

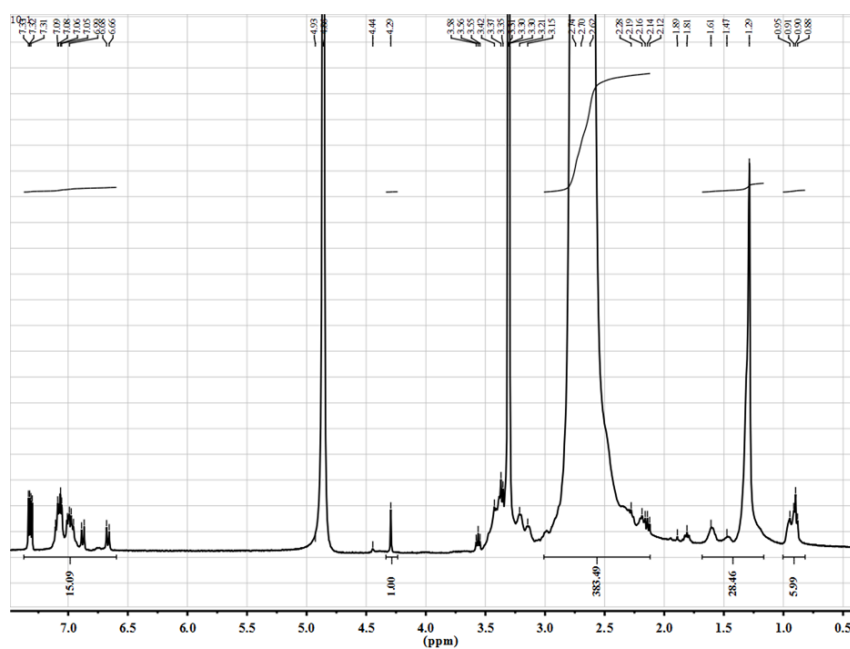

**Figure S2.**  $^1\text{H}$  NMR characterization of 10-1 TPEI in methanol- $d_4$ .

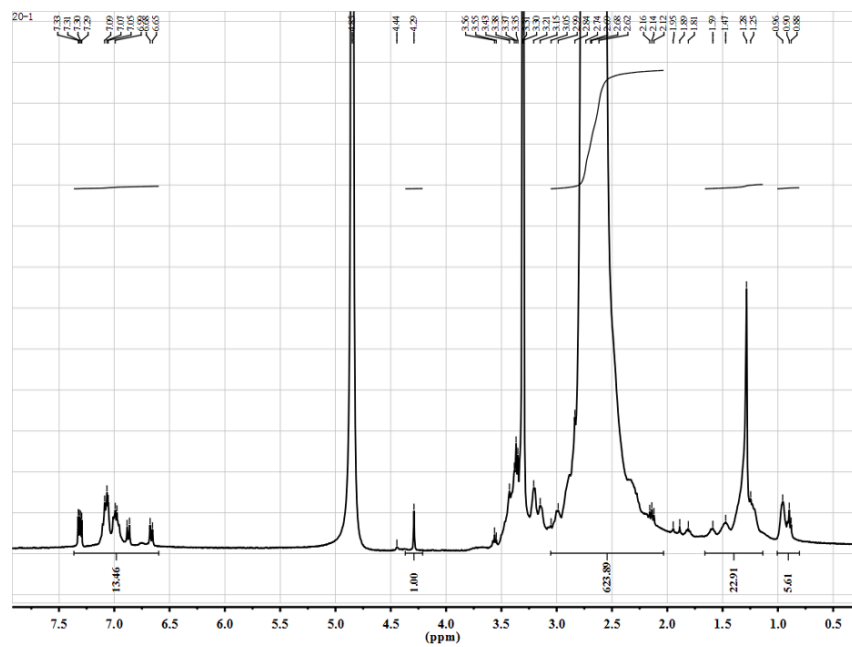

**Figure S3.**  $^1\text{H}$  NMR characterization of 20-1 TPEI in methanol- $d_4$ .

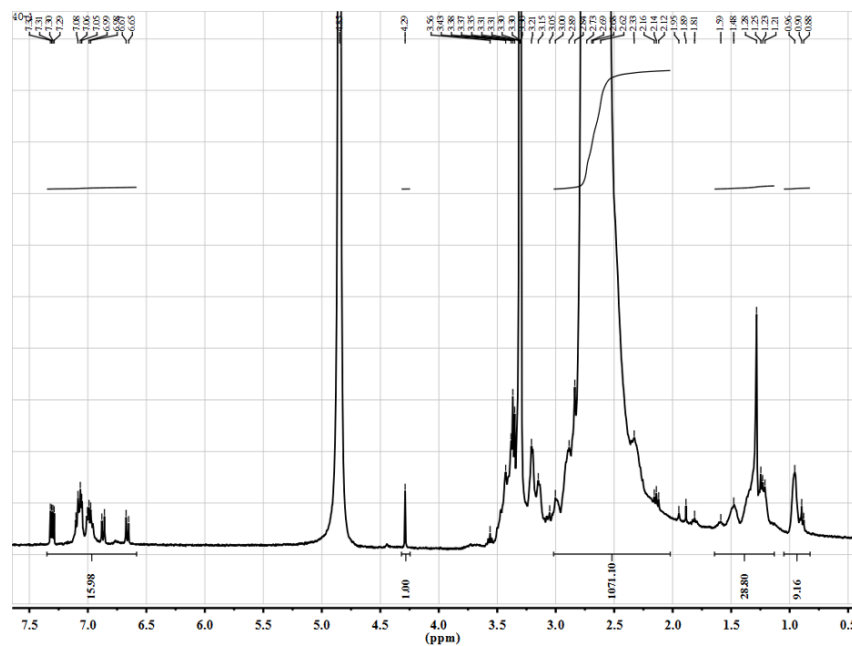

**Figure S4.**  $^1\text{H}$  NMR characterization of 40-1 TPEI in methanol- $d_4$ .

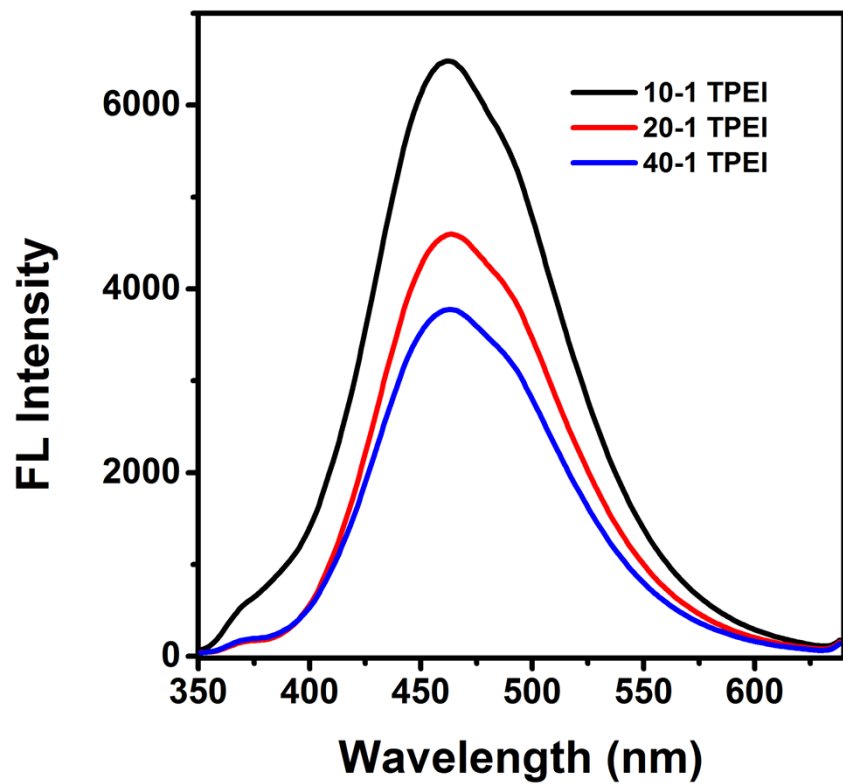

**Figure S5** Fluorescence spectra of TPEI powders (50 mg,  $\lambda_{\text{ex}} = 330$  nm)
